# Supplementary material for: Differential Impact of a Multicomponent Goals-of-Care Program in Patients with Hematologic and Solid Malignancies
Source: MDPI journal article supplement (doi:10.3390/cancers15051507), 2023-02-28
Supplement: s1 [file s1]

### Supplementary Material

Figure

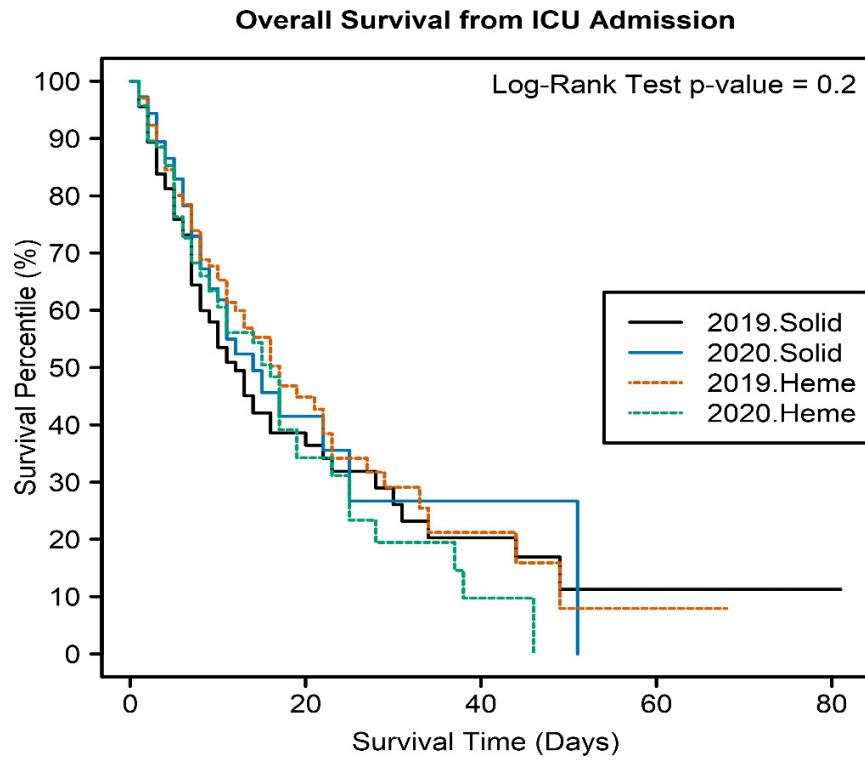

Figure S1. Overall survival from ICU Admission by Cancer Diagnosis and Time Period.
